# Supplementary material
Source: publisher figshare collection journal article supplement (https://gsapubs.figshare.com/articles/dataset/_/12541253)
Supplement: Supplementary file 1 [file 1]

## Sheet: Table DR1
Stevens Goddard, A.L., and Fosdick J.C., 2019, Multichronometer thermochronologic modeling of migrating spreading ridge subduction in southern Patagonia: Geology, https://doi.org/10.1130/G46091.1
GSA Data Repository Item 2019203
New AHe Data
Sample	Latitude	Longitude	Elevation (m)	Lithology	Grain	effective radius (μm)	U (ppm)	±	Th (ppm)	±	Sm (ppm)	±	eU	Ft	Ucorrected Single grain age (Ma ± 2σ)			Corrected Single grain age (Ma ± 2σ)
FPT17-68	-52.832	-72.9581	14	Tobífera Formation	ASG_FPT17-68_ap1	60.5904	1.26483	0.0767058	14.8554	0.398124	1.25793	0.163649	4.75584	0.743734	18.1045	±	1.01209	24.3172	±	2.02417
					ASG_FPT17-68_ap5	46.5676	1.94465	0.127304	12.6147	0.428306	1.27003	0.355423	4.9091	0.678762	10.2546	±	1.1616	15.0868	±	2.32319
FPT17-59	-52.804	-72.8272	31	Tobífera Formation	AG_FPT17-59_ap1	64.5453	14.2424	0.741211	43.0473	0.635966	6.56501	0.201254	24.3586	0.769896	5.44837	±	0.344004	7.07037	±	0.688007
					AG_FPT17-59_ap2	65.9238	18.0377	0.683589	51.7691	1.30262	3.16901	0.18452	30.2035	0.774701	4.92395	±	0.26351	6.35214	±	0.52702
					AG_FPT17-59_ap3	50.3504	13.6016	0.444315	37.9476	1.58701	5.17072	0.42445	22.5193	0.708873	3.52629	±	0.277387	4.96907	±	0.554774
FPT17-45	-52.5867	-72.2328	9	Conglomerate Clast, Escarpada Formation	ASG_FPT17-45_ap1	38.832	20.6906	0.746464	10.7902	0.482606	20.777	0.963025	23.2263	0.638371	6.14849	±	0.480491	9.59606	±	0.960982
					ASG_FPT17-45_ap3	50.3688	22.6781	0.514645	17.4558	0.865112	19.9774	1.41639	26.7802	0.719709	6.11093	±	0.321114	8.47188	±	0.642229
					ASG_FPT17-45_ap5	49.3366	24.8707	0.388597	30.4844	1.74199	25.626	0.755182	32.0346	0.712729	7.19968	±	0.342142	10.0766	±	0.684285
New ZHe Data
Sample	Latitude	Longitude	Elevation (m)	Lithology	Grain	effective radius (μm)	U (ppm)	±	Th (ppm)	±	Sm (ppm)	±	eU	Ft	Ucorrected Single grain age (Ma ± 2σ)			Corrected Single grain age (Ma ± 2σ)
FPT17-68	-52.832	-72.9581	14	Tobífera Formation	AG_FPT17-68_zr1	28.8604	1251.42	26.0908	619.336	9.0818	619.336	0.898615	1396.96	0.622363	10.9402	±	0.203027	17.5586	±	0.649422
					AG_FPT17-68_zr2	37.7744	873.643	14.6416	632.308	15.4362	632.308	0.326025	1022.24	0.703219	11.998	±	0.180477	17.0471	±	0.510982
					AG_FPT17-68_zr3	34.5892	1294.47	27.7654	680.547	11.4347	680.547	0.793876	1454.4	0.679962	11.4133	±	0.217092	16.7699	±	0.633959
					AG_FPT17-68_zr4	32.8587	497.705	7.45711	309.472	2.94893	309.472	0.264069	570.431	0.663015	10.8317	±	0.14262	16.3213	±	0.430544
FPT17-59	-52.804	-72.8272	31	Tobífera Formation	AG_FPT17-59_zr1	43.2861	159.584	2.645	126.656	1.49099	126.656	0.27579	189.348	0.737779	12.9345	±	0.181828	17.5186	±	0.490718
					AG_FPT17-59_zr2	30.758	1018.24	11.9081	5080.53	111.302	5080.53	0.307424	2212.17	0.619329	79.9616	±	1.06531	128.662	±	3.3718
					AG_FPT17-59_zr3	44.0912	729.869	10.6963	478.305	7.90685	478.305	0.145124	842.27	0.743614	13.7956	±	0.176525	18.5383	±	0.457069
					AG_FPT17-59_zr4	52.0828	277.706	6.32193	161.649	3.16608	161.649	0.132772	315.693	0.780941	12.8905	±	0.254403	16.4966	±	0.646336
*Background values for (U-Th-Sm)/He analyses are on the order of of 0.002 ncc 4He, 0.002 ng 238U, and 0.004 ng 232Th
New AFT Data
Sample	Latitude	Longitude	Elevation (m)	Lithology	Rho D	Nd	Ns	Ni	Number of Grains	Mean Uconc (ppm)	Central Age (Ma)	Error (Ma)
FPT17-68	-52.832	-72.9581	14	Tobífera Formation	1.69951e+06	4506	9	303	24	2.8	7.75	2.99
FPT17-59	-52.804	-72.8272	31	Tobífera Formation	1.71358e+06	4506	100	1365	30	10.1	21.92	2.89
FPT17-45	-52.5867	-72.2328	9	Conglomerate Clast, Escarpada Formation	1.72764e+06	4506	111	967	30	7.6	35.08	4.27
*ASG zeta = 344.9 ± 11.5

## Sheet: Table DR2
Table DR2.
SAMPLE INFORMATION (All Samples with > 1 Thermochronometer)						SAMPLE DATA					THERMAL MODEL DATA
latitude	longitude	Sample Name	Data Source	Tectonic Domain		ZHe	AFT	AHe	Modelled		Earliest Onset Neogene Cooling (Ma) (MAX tcool) **error bar**	Mean Onset Neogene Cooling (Ma) (MEAN tcool) *plotted*	Latest Onset Neogene Cooling (Ma) (MIN tcool) **error bar**	Temperature at onset of Cooling (°C)	Neogene change in cooling rate (Y/N/M)	Neogene Cooling Increase or Decrease (I/D)	Max onset change in cooling (Ma)	Min onset change in cooling (Ma)	Confidence of Model (High/Low)	Sample Index Number	Notes
-53.57	-72.4032	FO03-33	Thomson et al., 2010	B			x	x	modelled		21	18.25	15.5	95	N	-	-	-	H	1
-53.5327	-72.3527	FO03-50	Thomson et al., 2010	B			x	x	modelled		21	19	17	95	N	-	-	-	H	2
-53.4297	-72.9127	FO03-32	Thomson et al., 2010	B			x	x	modelled		25	21.5	18	100	M/N	D	11	6	H	3
-53.345	-73.1035	FO03-31	Thomson et al., 2010	B			x	x	Incompatible with Modeling
-53.1567	-73.2935	FO02-07	Thomson et al., 2010	B			x	x	modelled		22	18.5	15	90	N	-	-	-	H	4
-52.9752	-72.9528	FO02-11	Thomson et al., 2010	B			x	x	modelled		20	17.25	14.5	95	Y	I	9.5	7	H	5
-52.832	-72.9581	FPT17-68	This Study	H		x	x	x	modelled		19	18.75	18.5	175	Y	D	16	10	H	6
-52.804	-72.8272	FPT17-59	This Study	H		x	x	x	modelled		19.5	18.25	17	175	Y	D	17	11	H	7
-52.7265	-73.3678	FO02-18	Thomson et al., 2010	B			x	x	modelled		19	16.25	13.5	90	M/N	I	4	3	H	8
-52.5867	-72.2328	FPT17-45	This Study	I			x	x	modelled		14	11.5	9	65	Y	D	9	3.5	H	9
-52.4175	-73.7598	FO03-26	Thomson et al., 2010	B			x	x	modelled		21	18	15	95	M/N	D	16	10	H	10
-52.411	-73.7437	FO03-28	Thomson et al., 2010	B			x	x	modelled		21	18.75	16.5	120	Y	D	18	14	H	11
-51.3322	-72.8113	09-217	Fosdick et al., 2013	I		x		x	modelled		19	17	15	180	Y	D	8	5	H	12	model from Fosdick et al., 2013
-51.3065	-73.2148	09-190	Fosdick et al., 2013	I		x		x	modelled		20	18.75	17.5	170	Y	D	10	8	H	13	model from Fosdick et al., 2013
-51.1764	-72.9633	07-19	Fosdick et al., 2013	I		x		x	modelled		20	18.75	17.5	160	N	-	-	-	H	14	model from Fosdick et al., 2013
-51.0758	-73.2465	07-56	Fosdick et al., 2013	H		x		x	modelled		13.5	11.75	10	185	Y	D	10	9	H	15	model from Fosdick et al., 2013
-50.8458	-73.9458	THC117	Thomson et al., 2010	B			x	x	modelled		14	12	10	90	Y	D	10	6	L	16
-50.7933	-73.8808	THC119	Thomson et al., 2010	B			x	x	modelled		15	12.5	10	100	Y	D	7.5	5	H	17
-50.7883	-74.4238	THC95	Thomson et al., 2010	B			x	x	modelled		18	17	16	95	Y	D	18	14.5	L	18
-50.7817	-74.2575	THC124	Thomson et al., 2010	B			x	x	modelled		16	14.75	13.5	100	Y	D	12	10.5	L	19
-50.5892	-73.752	THC123	Thomson et al., 2010	H			x	x	modelled		12	9.75	7.5	100	N	-	-	-	H	20
-50.5088	-73.7158	THC122	Thomson et al., 2010	B			x	x	Unacceptable model for use
-50.199	-74.1668	THC 73	Thomson et al., 2001;2010	B			x	x	Unacceptable model for use
-50.089	-74.2427	THC 74	Thomson et al., 2001;2010	B			x	x	Unacceptable model for use
-50.03	-74.3328	THC 75	Thomson et al., 2001;2010	B			x	x	Unacceptable model for use
-49.9888	-74.362	THC 77	Thomson et al., 2001;2010	B			x	x	modelled		15.5	14.5	13.5	115	Y	D	15	13	L	21
-49.986	-74.3565	THC 78	Thomson et al., 2001;2010	B			x	x	Unacceptable model for use
-49.9392	-74.5548	THC81	Thomson et al., 2001;2010	B			x	x	Incompatible with Modeling
-49.8993	-74.6097	THC79	Thomson et al., 2001;2010	B			x	x	modelled		17	15.75	14.5	100	Y	D	16	11	L	22
-49.8765	-74.6158	THC 80	Thomson et al., 2001;2010	B			x	x	modelled		16	15	14	100	Y	D	15	12	H	23
-49.8453	-74.8127	THC 85	Thomson et al., 2001;2010	B			x	x	modelled		23	20.75	18.5	100	Y	D	22	16	H	24
-49.7135	-75.212	THC93	Thomson et al., 2010	B			x	x	Incompatible with Modeling
-49.605	-75.379	THC89	Thomson et al., 2010	B			x	x	modelled		31	29.5	28	110	Y	D	30	27	H	25
-49.5932	-75.371	THC90	Thomson et al., 2010	B			x	x	Incompatible with Modeling
-48.834	-75.0518	THC112	Thomson et al., 2010	B			x	x	modelled		25.5	23.25	21	85	Y	D	23	17	H	26
-48.8025	-75.4655	THC109	Thomson et al., 2010	B			x	x	Incompatible with Modeling
-48.8018	-75.4427	THC110	Thomson et al., 2010	B			x	x	modelled		16.5	13.25	10	50	M	-	-	-	L	27
-48.7695	-75.2022	THC111	Thomson et al., 2010	B			x	x	modelled		20	17.5	15	45	M	-	-	-	L	28
-48.7288	-73.9872	THC114	Thomson et al., 2010	H			x	x	modelled		15	13	11	100	N	-	-	-	H	29
-48.7278	-74.0458	THC115	Thomson et al., 2010	H			x	x	modelled		17	15.5	14	10	Y	D	16.5	12	L	30
-48.7092	-74.3288	THC116	Thomson et al., 2010	B			x	x	modelled		18	15.75	13.5	100	Y	D	12	9	H	31
-48.6885	-74.5535	THC105	Thomson et al., 2010	B			x	x	modelled		15	13.75	12.5	95	Y	D	14	10	L	32
-48.6167	-74.824	THC106	Thomson et al., 2010	B			x	x	modelled		19	16.25	13.5	80	Y	D	12	7	H	33
-48.5943	-75.0037	THC108	Thomson et al., 2010	B			x	x	modelled		23	21	19	100	Y	D	20	16	H	34
-48.5767	-74.955	THC107	Thomson et al., 2010	B			x	x	modelled		24.5	22.5	20.5	80	Y	D	24	16	L	35
-48.126	-73.4493	THC 11	Thomson et al., 2001;2010	B			x	x	modelled		12	10	8	100	N	-	-	-	H	36
-47.978	-74.6737	THC 6	Thomson et al., 2001;2010	B			x	x	modelled		-			-	N	-	-	-	H	37	sample has steady cooling from ~120° from 50 Ma
-47.9413	-74.8422	THC 4	Thomson et al., 2001;2010	B			x	x	modelled		24.5	22	19.5	90	M	D	11	9	L	38
-47.9387	-74.8278	THC3	Thomson et al., 2001;2010	B			x	x	modelled		24	22.5	21	85	M	D	10.5	7	H	39
-47.9307	-74.7847	THC5	Thomson et al., 2001;2010	B			x	x	modelled		23	19	15	90	N	-	-	-	H	40
-47.905	-74.3355	THC 7	Thomson et al., 2001;2010	B			x	x	modelled		14.5	12.25	10	90	Y	D	9	5	H	41
-47.7777	-74.3182	THC2	Thomson et al., 2001;2010	B			x	x	modelled		16	13	10	85	M	I	5	4	H	42
-47.5925	-72.8515	THC 14	Thomson et al., 2001;2010	B			x	x	modelled		9	7.75	6.5	100	N	-	-	-	H	43
-47.4363	-72.588	THC 16	Thomson et al., 2001;2010	H			x	x	modelled		10.5	8.75	7	95	Y	D	10	5	H	44
-47.053	-72.2478	THC 17	Thomson et al., 2001;2010	H			x	x	modelled		7.5	5.75	4	50	M	D	-	-	H	45
				*B = Basement					*Incompatible with modeling = no model results found
				*H = Hinterland					*Unacceptable model for use = no good fit paths found
				*I= Internal thrust belt
